# Supplementary material for: LncRNA ZFHX4-AS1 as a novel biomarker in adrenocortical carcinoma
Source: PubMed Central journal article supplement — Transl Androl Urol. 2024 Jul 16;13(7):1188–205. doi: 10.21037/tau-23-649 (PMC11291411; doi:10.21037/tau-23-649), 2024-07-16
Supplement: tau-13-07-1188-dss.pdf [file tau-13-07-1188-dss.pdf]

## Data Sharing Statement

|                     |                                                                                                                                                     |                                                                                                                  |
|---------------------|-----------------------------------------------------------------------------------------------------------------------------------------------------|------------------------------------------------------------------------------------------------------------------|
| <b>Article Info</b> | <a href="https://dx.doi.org/10.21037/tau-23-649">https://dx.doi.org/10.21037/tau-23-649</a>                                                         |                                                                                                                  |
| <b>Item</b>         | <b>Question</b>                                                                                                                                     | <b>Authors' Response<br/>(place "-" if not applicable)</b>                                                       |
| 1                   | Would you like to share data collected for your study to others?                                                                                    | Yes, if requested specifically.                                                                                  |
| 2                   | If not, would you like to share the reason for your decision?                                                                                       | -                                                                                                                |
| 3                   | What data in particular will be shared?                                                                                                             | The raw data related to cell culture will be shared.                                                             |
| 4                   | Any other documents will be shared? Such as study protocol, statistical analysis plan, informed consent form, clinical study report, analytic code. | Statistical analysis plan and analytic code will also be shared if requested.                                    |
| 5                   | When will data availability begin?                                                                                                                  | From the publication date.                                                                                       |
| 6                   | When will data availability end?                                                                                                                    | Two years within the publication date.                                                                           |
| 7                   | To whom will you share the data?                                                                                                                    | Adrenocortical cancer is of interest to oncologists and surgeons for diagnosis and treatment.                    |
| 8                   | For what type of analysis or purpose?                                                                                                               | Risk stratification and prognostic analysis for the evaluation of adrenocortical carcinoma.                      |
| 9                   | How or where can the data/documents be obtained?                                                                                                    | Emails could be sent to the address below to obtain the shared data: cg0804@jnu.edu.cn                           |
| 10                  | Any other restrictions?                                                                                                                             | We may balance the potential benefits and risks for each request and then provide the data that could be shared. |
