# Supplementary material for: LncRNA ZFHX4-AS1 as a novel biomarker in adrenocortical carcinoma
Source: PubMed Central journal article supplement — Transl Androl Urol. 2024 Jul 16;13(7):1188–205. doi: 10.21037/tau-23-649 (PMC11291411; doi:10.21037/tau-23-649), 2024-07-16
Supplement: tau-13-07-1188-supplementary.pdf [file tau-13-07-1188-supplementary.pdf]

**Supplementary**

**Table S1** This summary outlines the specific clinical characteristics of each cohort

| Accession                                            | TCGA-ACC        | GSE19750                                    | GSE10927     | GSE76019                              |
|------------------------------------------------------|-----------------|---------------------------------------------|--------------|---------------------------------------|
| Platform                                             | Illumina RNAseq | Affymetrix Human Genome U133 Plus 2.0 Array |              | Affymetrix HT HG-U133+ PM Array Plate |
| GPL                                                  |                 |                                             | GPL570       | GPL13158                              |
| PMID                                                 |                 | 24238056<br>26963385                        | 19147773     | 27307598<br>32147670                  |
| Number of All                                        | 79              | 48                                          | 65           | 34                                    |
| Number of ACC patients with survival information (%) | 79 (100%)       | 22 (46%)                                    | 24 (36%)     | 34 (100%)                             |
| Age, years                                           |                 |                                             |              | Children                              |
| ≤65                                                  | 68              | 5                                           | 22           |                                       |
| >65                                                  | 11              | 17                                          | 2            |                                       |
| Not available                                        | 0               | 0                                           | 0            |                                       |
| Gender                                               |                 |                                             |              |                                       |
| Male                                                 | 31              | 11                                          | 7            | 12                                    |
| Female                                               | 48              | 11                                          | 17           | 22                                    |
| Stage                                                |                 |                                             |              |                                       |
| I + II                                               | 46              | 8                                           | 13           | 17                                    |
| III + IV                                             | 31              | 14                                          | 11           | 17                                    |
| Not available                                        | 2               | 0                                           | 0            | 0                                     |
| Survival status                                      |                 |                                             |              |                                       |
| Alive                                                | 51              | 4                                           | 7            | 26                                    |
| Dead                                                 | 28              | 18                                          | 17           | 8                                     |
| Overall survival range (median) (months)             | 10–389 (80.2)   | 0–216 (37.2)                                | 1–149.6 (19) |                                       |
| Progression-free survival range (median) (months)    | 0.9–389 (37.2)  |                                             |              |                                       |
| Event-free survival range (median) (months)          |                 |                                             |              | 1.9–85 (NA)                           |

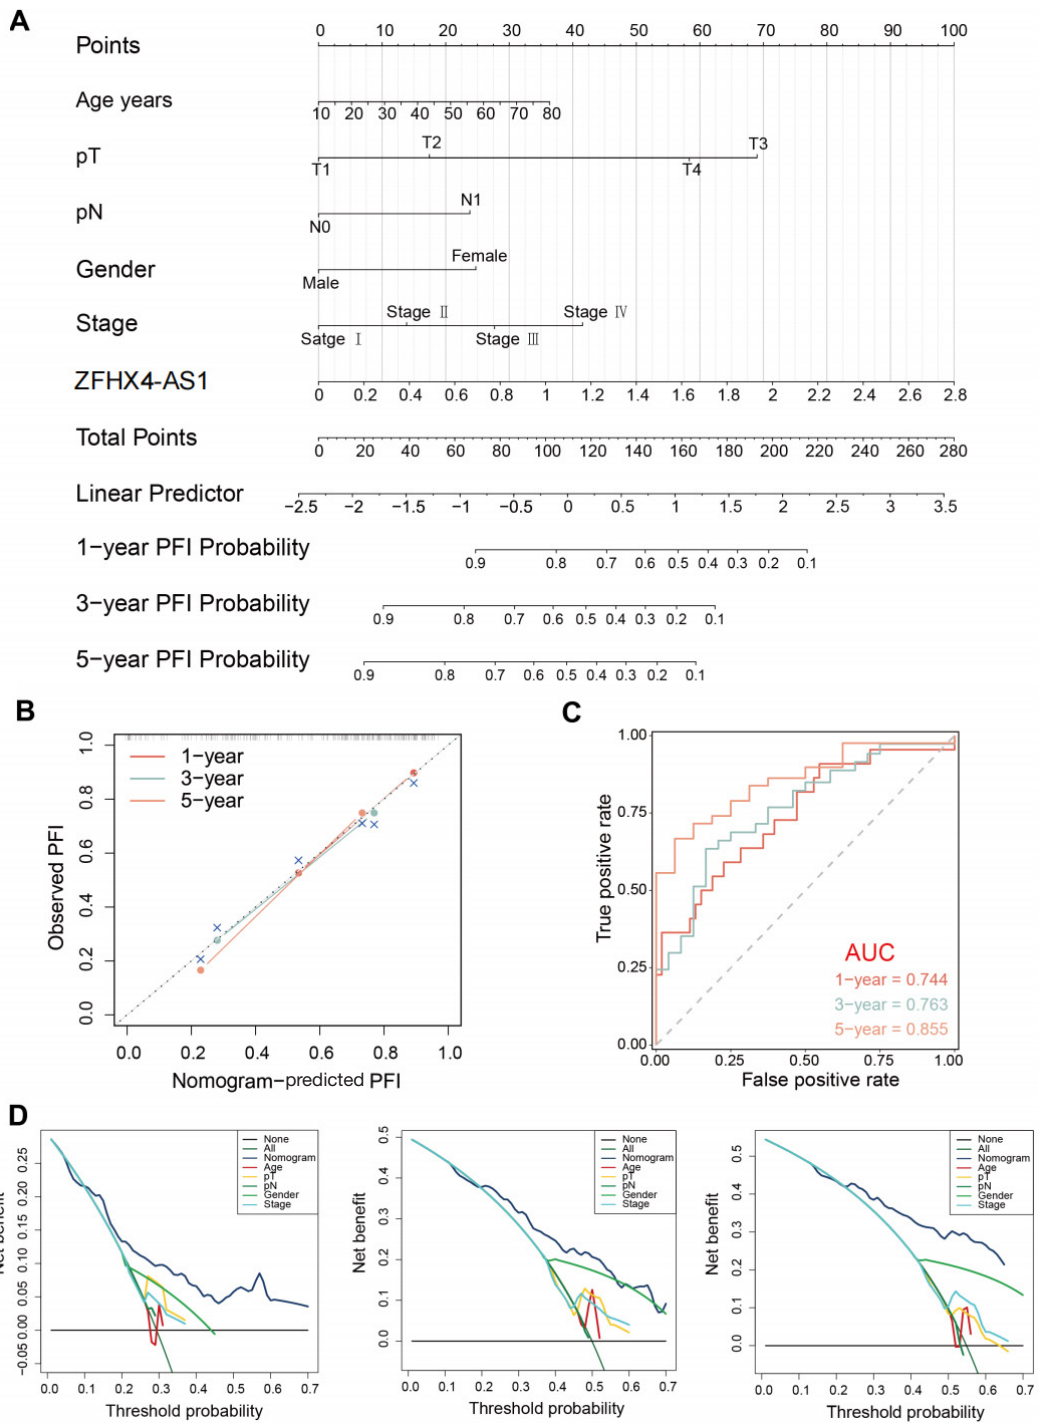

**Figure S1** Nomogram construction (A) and performance evaluation (B-D). TCGA-ACC (n=79). PFI, progression-free interval; AUC, area under the curve.
